# Supplementary material
Source: MDPI journal article supplement (https://www.mdpi.com/2071-1050/13/11/5861)
Supplement: s1 [file s1 › sustainability-1175378-SI.pdf]

## Supplementary Information

# Changing Personal Transportation Technology or Behavior? Impacts of a Behavioral Disruption

Marianne Pedinotti-Castelle <sup>1,\*</sup>, Pierre-Olivier Pineau <sup>2</sup>, Kathleen Vaillancourt <sup>3</sup> and Ben Amor <sup>1</sup>

<sup>1</sup> Interdisciplinary Research Laboratory on Sustainable Engineering and Ecodesign (LIRIDE), Civil Engineering Department, University of Sherbrooke, Sherbrooke, QC J1K 2R1, Canada

<sup>2</sup> Chair in Energy Sector Management, HEC Montréal, 3000 Chemin de la Côte-Sainte-Catherine, Montreal, QC H3T 2A7, Canada

<sup>3</sup> Esmia Consultants, Blainville, QC J7B 6B4, Canada

\* Correspondence: marianne.pedinotti-castelle@usherbrooke.ca

## 1. Electricity Supply

### 1.1. Hourly Electric Demand

Electricity demand has been broken down into four time slices and four seasons as detailed in Table S1. By defining a peak of demand as the highest 10%, the peaks of demand are between 7am and 10am and between 5pm and 9pm in the evening. The data in the table are based on Hydro Québec Distribution's hourly and daily electricity consumption data for the years 2016 to 2018 [1–3], shown in Figure S1. The objective of implementing an hourly electricity demand in NATEM is to be able to have results on the increase in peak demand, particularly winter peak demand.

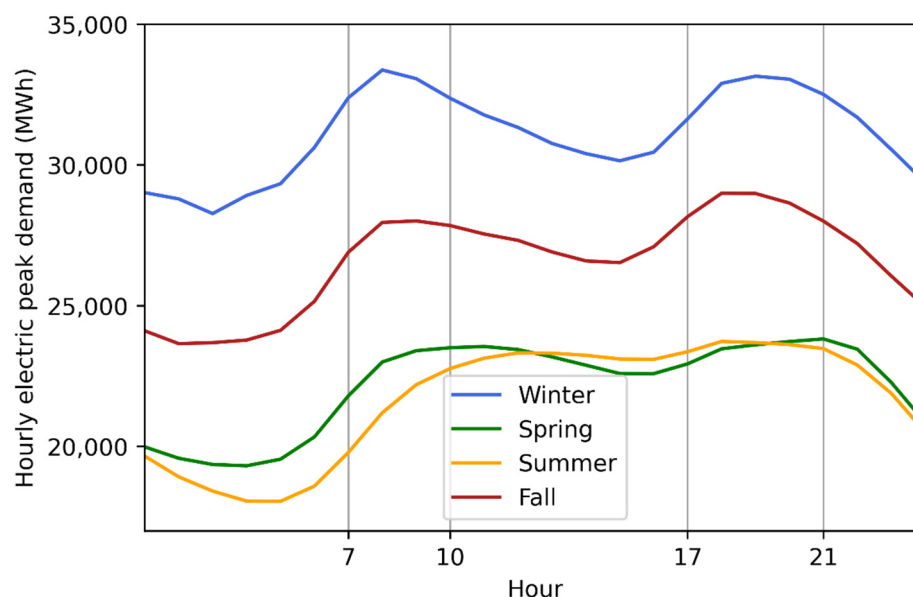

Figure S1. Hourly and seasonal electricity demand in Quebec.

Table S1. Time slices and associated part of the electricity consumption implemented in NATEM.

| Hour   | Winter | Spring | Summer | Fall  |
|--------|--------|--------|--------|-------|
| Peak 1 | 7.97%  | 5.57%  | 5.22%  | 6.72% |
| Day    | 7.48%  | 5.59%  | 5.63%  | 6.56% |
| Peak 2 | 7.93%  | 5.71%  | 5.73%  | 6.94% |
| Night  | 7.19%  | 4.98%  | 4.77%  | 6.01% |

### 1.2. Hourly Availability Factors

In line with the definition of hourly electricity demand, availability factors for power plants have been taken from the study of [4]. They are presented in Figure S2.

| Daily        | FD   | FN   | FP1  | FP2  | RD     | RN   | RP1  | RP2  | SD     | SN   | SP1  | SP2  | WD     | WN   | WP1  | WP2  |
|--------------|------|------|------|------|--------|------|------|------|--------|------|------|------|--------|------|------|------|
| Wind         | 0.42 | 0.44 | 0.45 | 0.36 | 0.33   | 0.36 | 0.42 | 0.31 | 0.31   | 0.36 | 0.41 | 0.29 | 0.39   | 0.41 | 0.42 | 0.34 |
| Solar        | 0.34 | 0.00 | 0.11 | 0.09 | 0.37   | 0.00 | 0.10 | 0.10 | 0.45   | 0.00 | 0.23 | 0.22 | 0.20   | 0.00 | 0.01 | 0.00 |
| Run of river | 0.57 | 0.57 | 0.57 | 0.57 | 0.62   | 0.62 | 0.62 | 0.62 | 0.57   | 0.57 | 0.57 | 0.57 | 0.57   | 0.57 | 0.57 | 0.57 |
| Seasonal     | fall |      |      |      | spring |      |      |      | summer |      |      |      | winter |      |      |      |
| Run of river | 0.57 |      |      |      | 0.62   |      |      |      | 0.57   |      |      |      | 0.57   |      |      |      |
| Annual       |      |      |      |      |        |      |      |      |        |      |      |      |        |      |      |      |
| Run of river |      |      |      |      |        |      |      |      |        |      |      |      |        |      |      | 0.53 |
| Dam hydro    |      |      |      |      |        |      |      |      |        |      |      |      |        |      |      | 0.53 |

The first letter of the time slice code indicates the season (F: fall, R: spring, S: summer, W: winter), the second the fraction of the day (D: 9am-4pm, N: 8pm-5am, P1: 6am-8am, P2: 5pm-7pm).

**Figure S2.** Availability factors of renewable electricity production technologies.

### 1.3. Incremental Electricity Costs

With the increase in electricity demand, the model must invest in new infrastructure. The incremental electricity processes are derived from [5–9] and presented in Table S2 below.

**Table S2.** Costs of the incremental electricity processes updated in NATEM.

| Technology                | Year | Investment Costs (\$/kW) | Fixed O&M (\$/kW) | Capacity Limit (GW) |
|---------------------------|------|--------------------------|-------------------|---------------------|
| Dam 1                     | 2015 | 6035                     | 17.10             | 7                   |
| Dam 2                     | 2015 | 6733                     | 17.10             | 10                  |
| Dam 3                     | 2015 | 7481                     | 17.10             | ∞                   |
| Run of river              | 2015 | 5486                     | 24.00             | ∞                   |
| Wind onshore              | 2015 | 2480                     | 68.40             | ∞                   |
|                           | 2030 | 2252                     |                   |                     |
|                           | 2050 | 2041                     |                   |                     |
| Wind offshore fix         | 2015 | 4103                     | 114.00            | ∞                   |
|                           | 2030 | 3975                     |                   |                     |
|                           | 2050 | 3848                     |                   |                     |
| Wind offshore floating    | 2020 | 5094                     | 148.20            | ∞                   |
|                           | 2030 | 4956                     |                   |                     |
|                           | 2050 | 4815                     |                   |                     |
| Photovoltaic Fix 1MW      | 2015 | 2702                     | 54.72             | ∞                   |
|                           | 2030 | 2170                     | 51.30             |                     |
|                           | 2050 | 1529                     | 49.02             |                     |
| Photovoltaic Fix 10MW     | 2015 | 2456                     | 54.72             | ∞                   |
|                           | 2030 | 1795                     | 51.30             |                     |
|                           | 2050 | 1349                     | 49.02             |                     |
| Photovoltaic Fix 100MW    | 2015 | 2210                     | 54.72             | ∞                   |
|                           | 2030 | 1195                     | 51.30             |                     |
|                           | 2050 | 1167                     | 49.02             |                     |
| Photovoltaic 1 axis 1MW   | 2015 | 3106                     | 54.72             | ∞                   |
|                           | 2030 | 2358                     | 51.30             |                     |
|                           | 2050 | 1624                     | 49.02             |                     |
| Photovoltaic 1 axis 10MW  | 2015 | 2824                     | 54.72             | ∞                   |
|                           | 2030 | 1945                     | 51.30             |                     |
|                           | 2050 | 1421                     | 49.02             |                     |
| Photovoltaic 1 axis 100MW | 2015 | 2541                     | 54.72             | ∞                   |
|                           | 2030 | 1862                     | 51.30             |                     |
|                           | 2050 | 1370                     | 49.02             |                     |

## 2. Supplementary Analysis

### 2.1. Carbon Capture and Storage

This section presents additional results. In the main study, all scenarios reach 80% GHG reduction by 2050, with the help of carbon capture and sequestration (CCS) technologies. These scenarios do not take into account the social acceptability and slow maturation rate of these technologies. Considering a limited use of CCS (2,500 Mt CO<sub>2</sub>eq), the model is able to achieve a 65% reduction in GHG emissions by 2050 (The assumptions about the availability and techno-economic parameters of technologies may not be identical to [10]). The reduction targets achieved are presented in Table S3 below. Carbon capture and sequestration and the negative emissions generated in the different scenarios are presented in Figure S3.

**Table S3.** Quebec 65% GHG emissions reduction 2030 and 2050 targets.

| Year | Reduction (Compared to 1990) | Emissions (Mt CO <sub>2</sub> eq) |
|------|------------------------------|-----------------------------------|
| 1990 | -                            | 86.5                              |
| 2030 | -25%                         | 68.2                              |
| 2050 | -65%                         | 31.8                              |

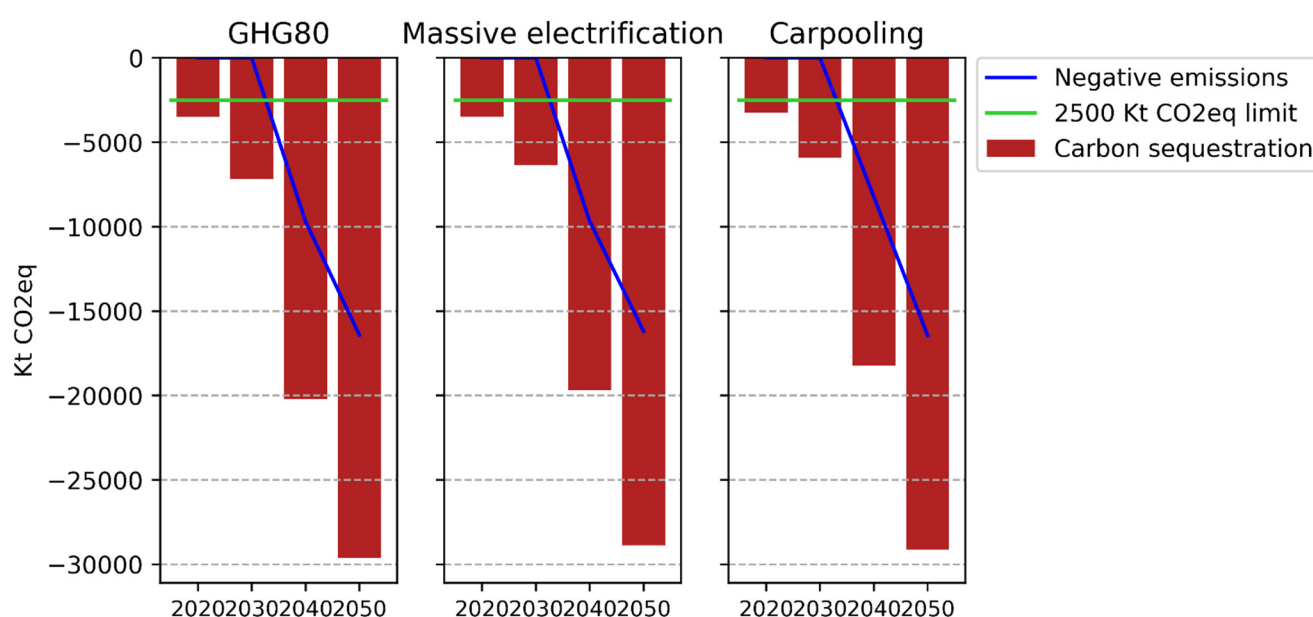

**Figure S3.** Required potential of sequestration and negative emissions with 80% GHG emissions reduction and the scenarios considered.

The emissions associated with a 65% GHG emissions reduction and each scenario are presented in Figure S4.

The advantage of this figure is that with the lower constraint on GHG emission reductions (only 65% by 2050), it allows us to see the real avoided emissions generated by a behavioural disruption policy or a massive electrification policy. According to our model, the effects of a massive electrification policy would permit to avoid between 1.8 Mt of CO<sub>2</sub>eq in 2030, 3.2 Mt of CO<sub>2</sub>eq in 2030 and 1.1 Mt CO<sub>2</sub>eq in 2050 relative to the GHG emissions reduction scenario. The effects of a behavioral disruption alone would permit to avoid between 5.9 Mt of CO<sub>2</sub>eq in 2030 and 0.7 Mt CO<sub>2</sub>eq in 2050 relative to the GHG emissions reduction scenario.

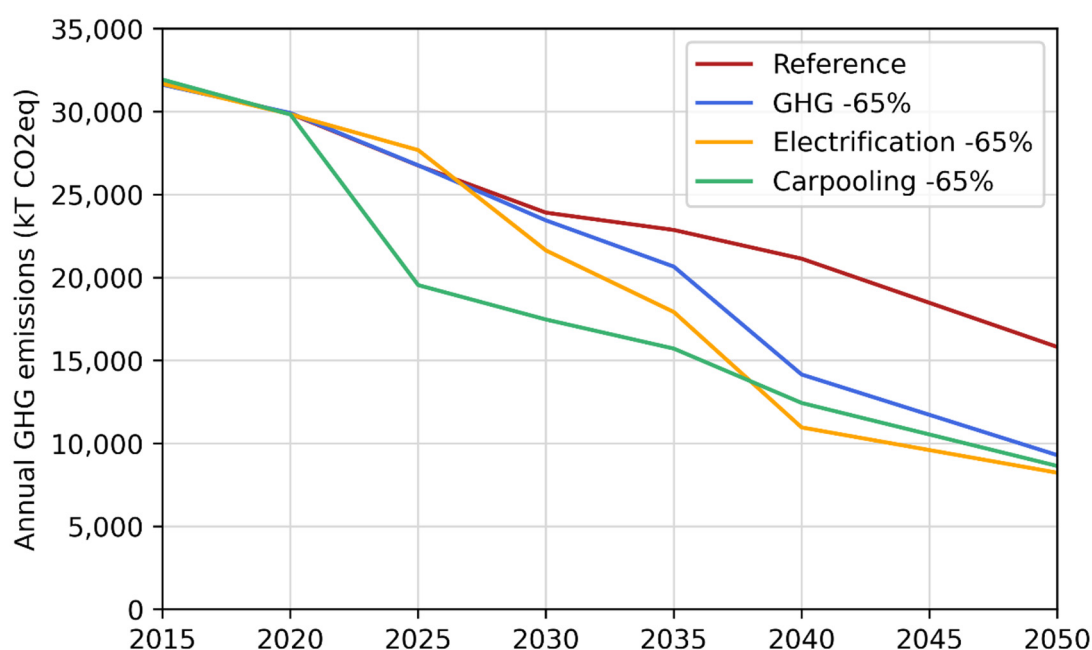

**Figure S4.** Total GHG emissions with 65% GHG emissions reduction target and the four scenarios considered.

## 2.2. Peak Demand

In the main document, we focused on the increase in electrical capacity related to the different scenarios, and the constraint of reducing GHG emissions by 80% by 2050. We pointed out that the increased electricity demand could be all the more important when happening at peak times, and especially in winter. Figure S5 shows net winter electricity imports (in PJ). With the hourly definition of electricity demand detailed in Section 2.1, imports are also broken down into four time slices.

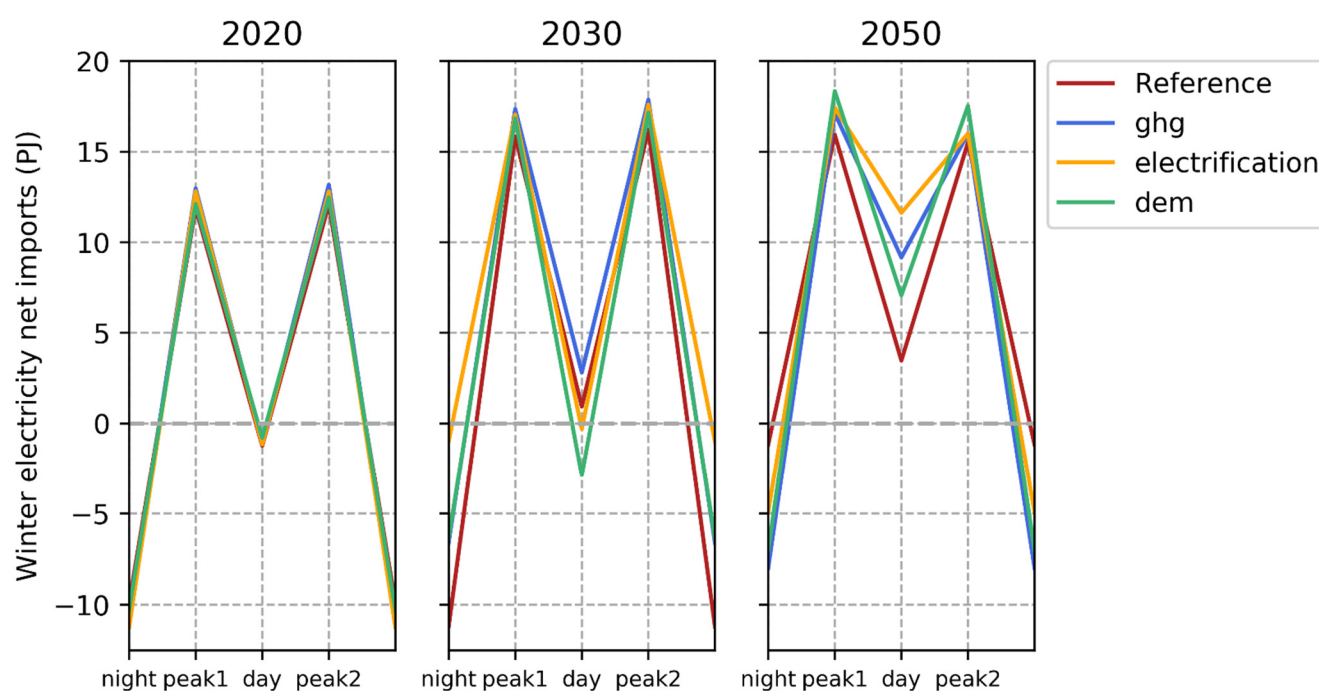

**Figure S5.** Winter net electricity imports under the four scenarios and the four time slices considered.

## References

1. Régie de l'Énergie du Québec Demande relative à l'établissement des tarifs d'électricité pour l'année tarifaire 2018–2019 Available online: [http://publicsde.regie-energie.qc.ca/\\_layouts/publicsite/ProjectPhaseDetail.aspx?ProjectID=414&phase=1&Provenance=A&generate=true](http://publicsde.regie-energie.qc.ca/_layouts/publicsite/ProjectPhaseDetail.aspx?ProjectID=414&phase=1&Provenance=A&generate=true) (accessed on 17 December 2019).
2. Régie de l'Énergie du Québec Demande relative à l'établissement des tarifs d'électricité pour l'année tarifaire 2016–2017 Available online: [http://publicsde.regie-energie.qc.ca/\\_layouts/publicsite/ProjectPhaseDetail.aspx?ProjectID=317&phase=1&Provenance=A&generate=true](http://publicsde.regie-energie.qc.ca/_layouts/publicsite/ProjectPhaseDetail.aspx?ProjectID=317&phase=1&Provenance=A&generate=true) (accessed on 17 December 2019).
3. Régie de l'Énergie du Québec Demande relative à l'établissement des tarifs d'électricité pour l'année tarifaire 2017–2018 Available online: [http://publicsde.regie-energie.qc.ca/\\_layouts/publicsite/ProjectPhaseDetail.aspx?ProjectID=382&phase=1&Provenance=A&generate=true](http://publicsde.regie-energie.qc.ca/_layouts/publicsite/ProjectPhaseDetail.aspx?ProjectID=382&phase=1&Provenance=A&generate=true) (accessed on 17 December 2019).
4. Astudillo, M.F.; Vaillancourt, K.; Pineau, P.-O.; Amor, B. Can the household sector reduce global warming mitigation costs? sensitivity to key parameters in a TIMES techno-economic energy model. *Appl. Energy* **2017**, *205*, 486–498, doi:10.1016/j.apenergy.2017.07.130.
5. REN21. *Renewables 2018 Global Status Report*; 2018; ISBN 9783981810769. Available online: <https://www.ren21.net/gsr-2018/> (accessed on 17 December 2019).
6. IRENA. *Renewable Power Generation Costs in 2018*; 2018; ISBN 978-92-9260-040-2. Available online: <https://www.irena.org/publications/2019/May/Renewable-power-generation-costs-in-2018> (accessed on 17 December 2019).
7. IRENA. *The Power to Change: Solar and Wind Cost Reduction Potential to 2025*; 2016; ISBN 9789295111974. Available online: <https://www.irena.org/publications/2016/Jun/The-Power-to-Change-Solar-and-Wind-Cost-Reduction-Potential-to-2025> (accessed on 17 December 2019).
8. Trottier Energy Futures Project. *Canada's challenge & opportunity. Transformations for major reductions in GHG emissions*; 2016; Available online: <https://davidsuzuki.org/science-learning-centre-article/report-canadas-challenge-opportunity-transformations-major-reductions-ghg-emissions/> (accessed on 17 December 2019).
9. Anderson, C.; Feldman, D.; Tinker, L. *National survey report of photovoltaic applications in Canada for 2017*; 2018; Available online: [https://iea-pvps.org/wp-content/uploads/2020/01/National\\_Survey\\_Report\\_of\\_PV\\_Power\\_Applications\\_in\\_USA\\_-\\_2016.pdf](https://iea-pvps.org/wp-content/uploads/2020/01/National_Survey_Report_of_PV_Power_Applications_in_USA_-_2016.pdf) (accessed on 17 December 2019).
10. Poirier, M.; Vaillancourt, K.; Joly, E. *Trajectoires de réduction d'émissions de GES du Québec – Horizons 2030 et 2050*; 2019; Available online: [https://www1.fccq.ca/wp-content/uploads/2020/08/Memoire-FCCQ-Preconsultations-SPEDE\\_2024-2030-V1.pdf](https://www1.fccq.ca/wp-content/uploads/2020/08/Memoire-FCCQ-Preconsultations-SPEDE_2024-2030-V1.pdf) (accessed on 17 December 2019).
